# Supplementary material for: Novel stilbene scaffolds efficiently targetMycobacterium tuberculosisnucleoid-associated protein, HU
Source: Royal Society of Chemistry journal article supplement (doi:10.1039/d0nj05947a), 2021-01-01
Supplement: d0nj05947a1.pdf [file d0nj05947a1.pdf]

ARTICLE

## Supplementary materials: Novel stilbene scaffolds efficiently target *Mycobacterium tuberculosis* nucleoid-associated protein, HU

Ramalingam Peraman,<sup>\*a</sup> Geethavani Meka,<sup>a</sup> Naresh Babu Chilamakuru,<sup>a</sup> Vinay Kumar Kutagulla,<sup>a</sup> Saloni Malla,<sup>b</sup> Charles R. Ashby, Jr.,<sup>c</sup> Amit K Tiwari,<sup>\*b</sup> Padmanabha Reddy Yiragamreddy<sup>a</sup>

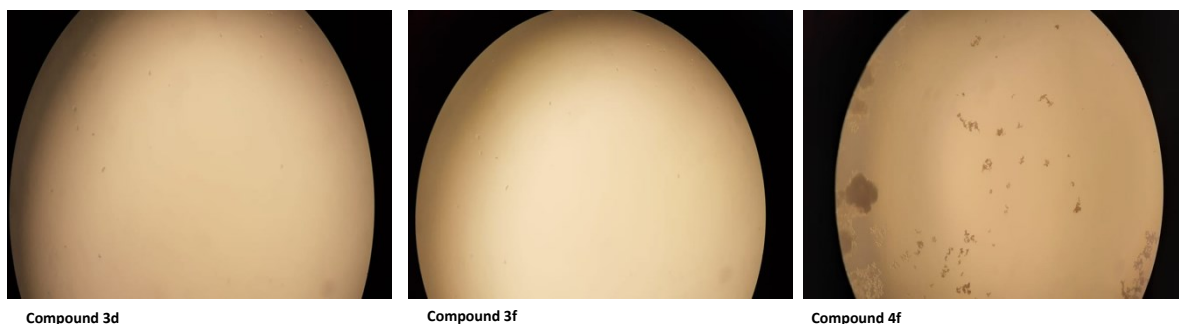

**Figure S1** Compound 3d (no live cells), 3f (no live cells), and 4f (minimal cells) nucleoid morphology of *Mycobacterium tuberculosis* with Fluorescent micrograph.
